# Supplementary material for: The impact of gender-affirming interventions on eating disorder diagnosis risk among transgender and gender-diverse individuals
Source: PubMed Central journal article supplement — Commun Med (Lond). 2024 Dec 31;4:283. doi: 10.1038/s43856-024-00704-7 (PMC11688434; doi:10.1038/s43856-024-00704-7), 2024-12-31
Supplement: 43856_2024_704_MOESM2_ESM.pdf [file 43856_2024_704_MOESM2_ESM.pdf]

## Description of Additional Supplementary Files

**File name:** Supplementary Data

**File description:** The cohort creation criteria for the transfeminine and transmasculine cohorts
